# Supplementary material for: TLR-3 is Present in Human Adipocytes, but Its Signalling is Not Required for Obesity-Induced Inflammation in Adipose Tissue In Vivo
Source: PubMed Central journal article supplement (PMC4395029; doi:10.1371/journal.pone.0123152), 2015-04-13
Supplement: pone.0123152.s005.pdf [file pone.0123152.s005.pdf]

|                                   | Subcutaneous adipose tissue biopsies |
|-----------------------------------|--------------------------------------|
| N                                 | 80                                   |
| % male                            | 48%                                  |
| Age (years) $\pm$ SD              | 54,7 $\pm$ 8,4                       |
| BMI (kg/m <sup>2</sup> ) $\pm$ SD | 27,7 $\pm$ 4,8                       |
| Fasting glucose (mmol/L) $\pm$ SD | 5,1 $\pm$ 0,6                        |
| HOMA-IR $\pm$ SD                  | 2,3 $\pm$ 2,1                        |
| hs-CRP (mg/L) $\pm$ SD            | 1,6 $\pm$ 1,7                        |
